# Supplementary material for: Metformin alleviates nickel-induced autophagy and apoptosis via inhibition of hexokinase-2, activating lipocalin-2, in human bronchial epithelial cells
Source: PubMed Central journal article supplement (PMC5739657; doi:10.18632/oncotarget.22317), 2017-11-06
Supplement: oncotarget-08-105536-s001.pdf [file oncotarget-08-105536-s001.pdf]

# Metformin alleviates nickel-induced autophagy and apoptosis via inhibition of hexokinase-2, activating lipocalin-2, in human bronchial epithelial cells

## SUPPLEMENTARY MATERIALS

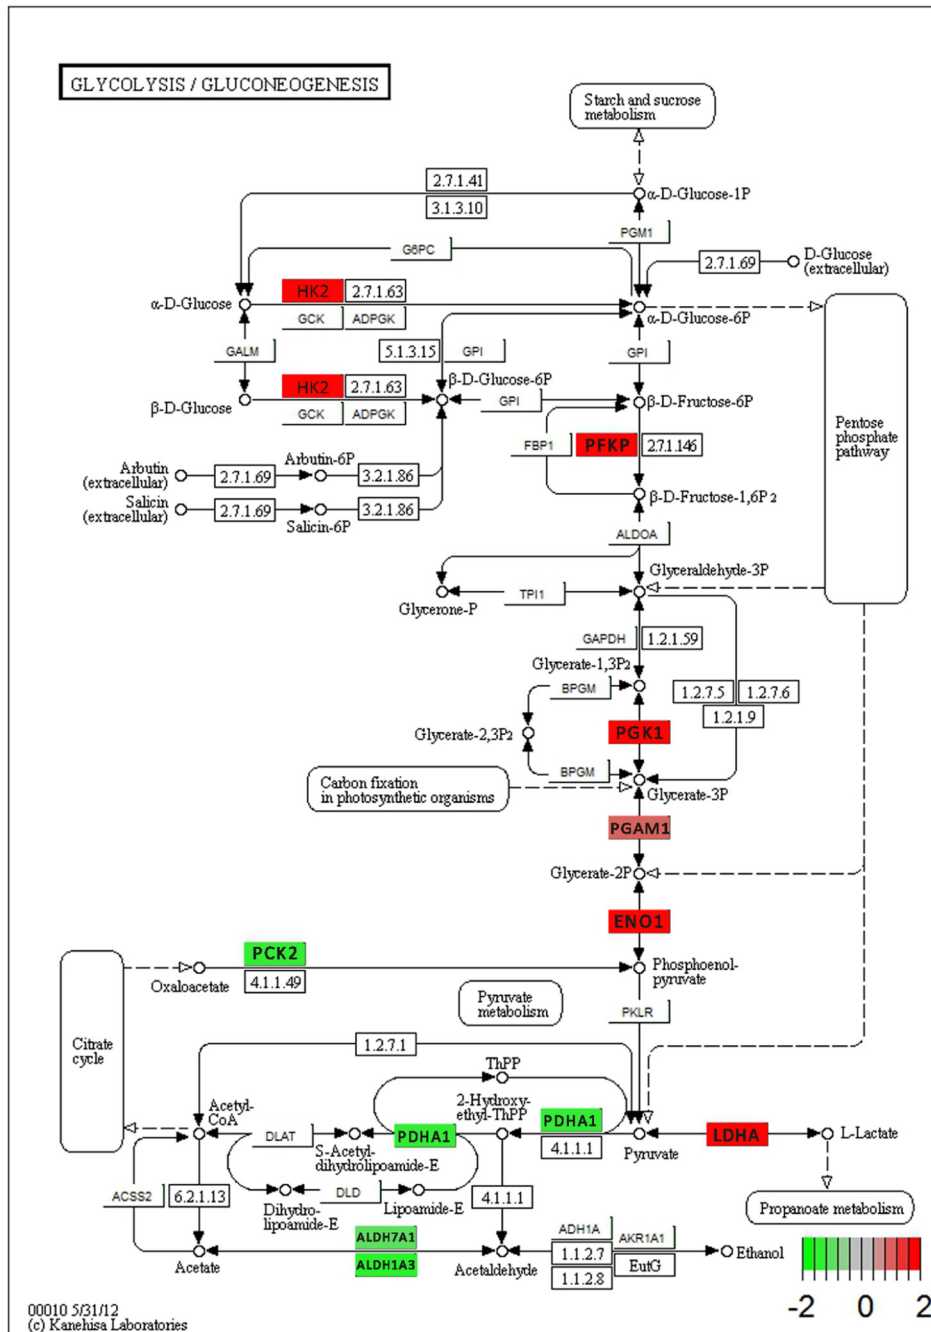

**Supplementary Figure 1: Glycolysis/Gluconeogenesis pathway as defined in the KEGG Pathway database.** Green and red boxes indicate down- and up-regulation, respectively.

(A)

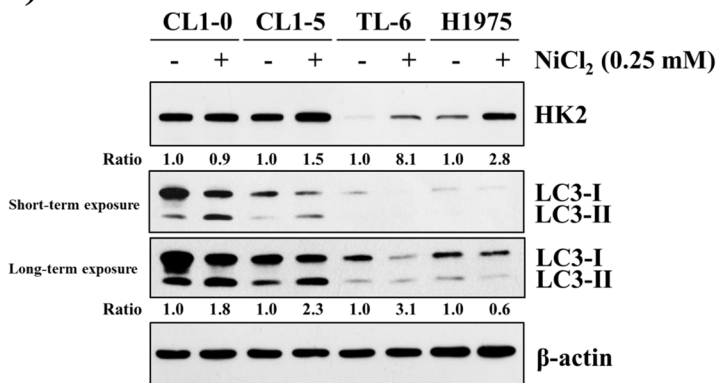

(B)

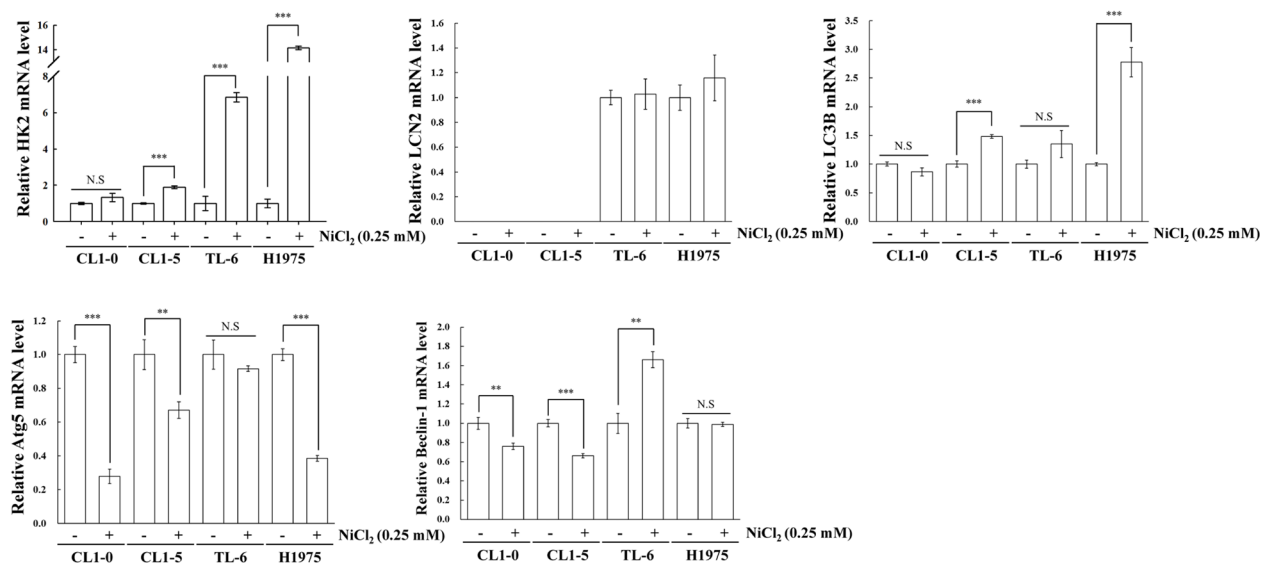

**Supplementary Figure 2: The expressions of HK2 and LC3B are upregulated under NiCl<sub>2</sub> exposure in several lung cancer cell lines.** CL1-0, CL1-5, TL-6 and H1975 cells (5×10<sup>5</sup> cells/ 6 cm dish) were treated with NiCl<sub>2</sub> (0, 0.25 mM) for 48 h. (A) The protein levels of HK2 and LC3B were determined on western blot. β-actin was used as internal control. (B) The mRNA levels of HK2, LCN2, LC3B, Atg5 and Beclin-1 were detected by real-time PCR. \*\*p<0.01 and \*\*\*p<0.001, two-tailed t test. N.S, no significance.

**Supplementary Table 1: Glycolysis-related gene mRNA fold changes in NiCl<sub>2</sub>-exposure BEAS-2B cells**

| Gene symbol                                | Processed signal (raw) |                          | Fold change |
|--------------------------------------------|------------------------|--------------------------|-------------|
|                                            | Control                | NiCl <sub>2</sub> 0.5 mM |             |
| Hexokinase 2 (HK2)                         | 176.02                 | 4212.95                  | 38.50       |
| Homo sapiens enolase 1 (ENO1)              | 10359.77               | 72121.87                 | 6.96        |
| Phosphofructokinase, platelet (PFKP)       | 8174.27                | 17985.48                 | 2.20        |
| Phosphoglycerate mutase 1 (PGAM1)          | 1460.91                | 1647.05                  | 1.12        |
| Phosphoglycerate kinase 1 (PGK1)           | 16115.57               | 48727.95                 | 3.02        |
| Phosphoenolpyruvate carboxykinase 2 (PCK2) | 5354.25                | 511.41                   | 0.10        |
| Lactate dehydrogenase A (LDHA)             | 5713.74                | 22830.16                 | 3.99        |
| Pyruvate dehydrogenase alpha 1 (PDHA1)     | 4910.544               | 940.437                  | 0.19        |

\*Cell were exposed to 0.5 mM NiCl<sub>2</sub> for 48 h.

Supplementary Table 2: Relationships between HK2 H-score and clinical characteristics

| Variable          | Number | HK2 expression     |                | p Value        |
|-------------------|--------|--------------------|----------------|----------------|
|                   |        | Non-detectable (%) | Detectable (%) |                |
| Age (yrs)         |        |                    |                |                |
| ≤55               | 11     | 05 (45.5%)         | 06 (54.5%)     | 0.105          |
| > 55              | 61     | 43 (70.5%)         | 18 (19.5%)     |                |
| Gender            |        |                    |                |                |
| Female            | 36     | 24 (66.7%)         | 12 (33.3%)     | 1.000          |
| Male              | 36     | 24 (66.7%)         | 12 (33.3%)     |                |
| Grade             |        |                    |                |                |
| I                 | 11     | 08 (72.7%)         | 03 (27.3%)     | 0.643          |
| II, III           | 61     | 40 (65.6%)         | 21 (34.4%)     |                |
| Stage             |        |                    |                |                |
| I, II             | 48     | 28 (58.3%)         | 20 (41.7%)     | <b>00.034*</b> |
| III, IV           | 24     | 20 (83.3%)         | 04 (16.7%)     |                |
| Tumor T status    |        |                    |                |                |
| T1, 2             | 19     | 36 (61.0%)         | 23 (39.0%)     | <b>0.030*</b>  |
| T3, 4             | 40     | 12 (92.3%)         | 01 (07.7%)     |                |
| Lymph node status |        |                    |                |                |
| N0                | 46     | 29 (63.0%)         | 17 (37.0%)     | 0.386          |
| N1, 2, 3          | 26     | 19 (73.1%)         | 07 (26.9%)     |                |
| Metastasis        |        |                    |                |                |
| M0                | 57     | 34 (59.6%)         | 23 (40.4%)     | <b>00.014*</b> |
| M1                | 15     | 14 (93.3%)         | 01 (6.70%)     |                |
| LC3B expression   |        |                    |                |                |
| - (Absence)       | 55     | 35 (63.6%)         | 20 (36.4%)     | 0.327          |
| + (Presence)      | 17     | 13 (76.5%)         | 04 (23.5%)     |                |
